# Supplementary material
Source: PubMed Central journal article supplement (PMC3147429)
Supplement: supp_77_15_5483__1.pdf [file supp_77_15_5483__1.pdf]

**Supplementary Figure 1.** Tris-tricine SDS-PAGE analysis of StX-1787wt purification steps

lane 1, molecular weight marker;

lane 2, Crude extract from *E. coli* BL21 pStX-1787wt (10 µg)

lane 3, Heat treated (20 min at 70°C) crude extract (5 µg)

lane 4, Pooled fractions after Source15Q ion exchange chromatography (3 µg)

lane 5, Pooled fractions after Superdex200 ion exchange chromatography (3 µg)

lane 6, Pooled fractions after Superdex200 ion exchange chromatography (9 µg)

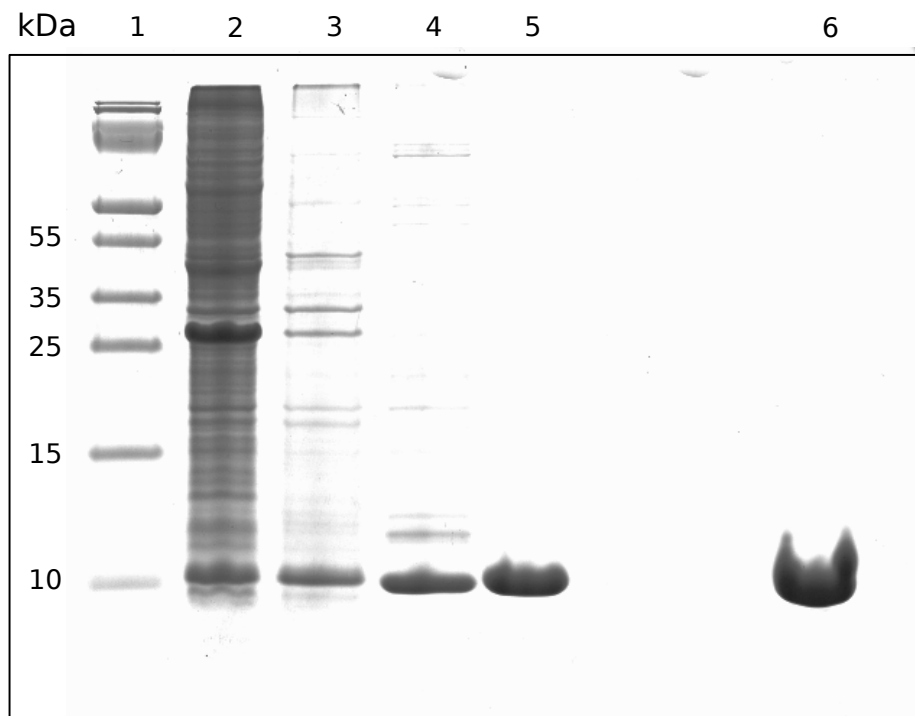

Purification table for StX-1787wt.

Purity was estimated by band intensity measurements of the SDS-PAGE gel from Supplementary Fig. 1 using the ImageJ software (<http://rsb.info.nih.gov/ij/index.html>)

| <b>Fraction</b>   | <b>Total protein [mg]</b> | <b>Purity [%]</b> | <b>Yield [%]</b> | <b>Purification [fold]</b> |
|-------------------|---------------------------|-------------------|------------------|----------------------------|
| Cell-free extract | 128.6                     | 5.7               | 100              |                            |
| Heat treated      | 24.3                      | 39.3              | 84.1             | 6.9                        |
| Source 30Q        | 3.8                       | 78.3              | 54.3             | 13.7                       |
| Superdex 200      | 2.6                       | 99.2              | 5.12             | 17.4                       |
