# Supplementary material
Source: PubMed Central journal article supplement (PMC3147429)

**Supplementary figure 2.**

Tris-tricine SDS-PAGE analysis of the binding of the recombinant module StX-1787wt to microcrystalline cellulose (Avicel).

Lane 1, heat-treated fraction of E. coli BL21 pStX-1787wt (10 µg/lane); lanes 2 and 3, consecutive washes of Avicel (at 10 mg/ml) after incubation with 0.1 mg of the sample from lane 1 in 0.3 ml binding buffer; lanes 4, 5 and 6, elution fractions (2, 6 and 12 µl/lane respectively) of Avicel pellet after incubation with 0.1 mg of the sample from lane 1 and elution with SDS gel loading buffer at 95°C for 10 min; lane 7, molecular weight marker. The binding and wash conditions are described in the Materials and methods section.

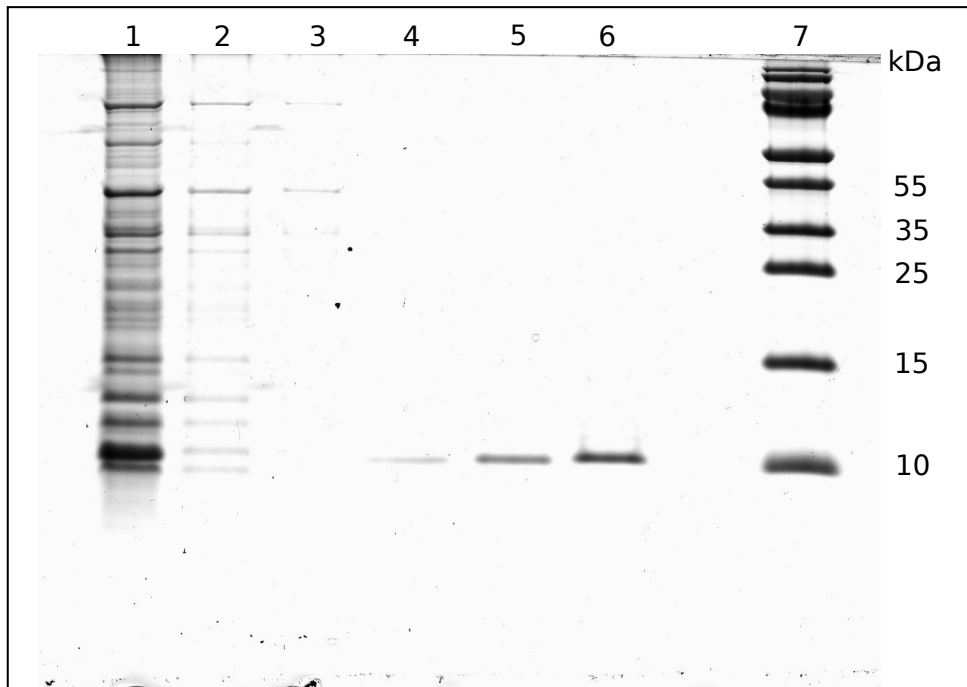

Supplement: supp_77_15_5483__2.pdf [file supp_77_15_5483__2.pdf]
